# Supplementary material
Source: publisher site journal article supplement (https://www.dovepress.com/article/561672)
Supplement: Supplementary file 1 [file 561672%20Supplementary%20file.docx]

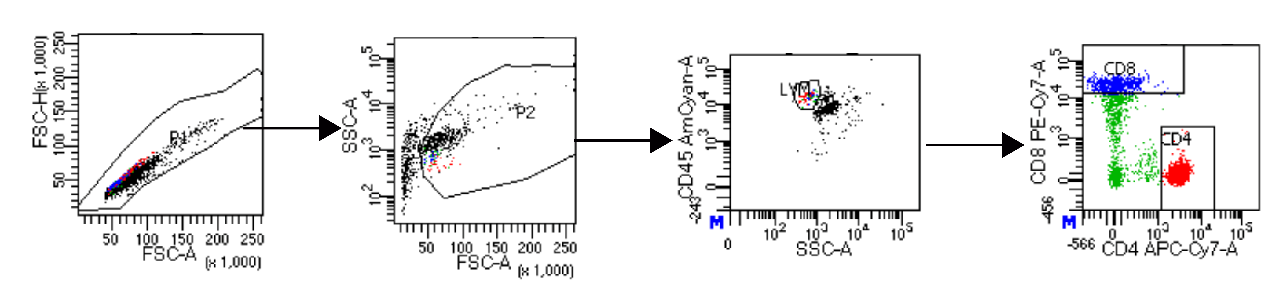


**Supplementary** **Figure S1. Sequential gating strategy for T lymphocyte subset analysis by flow cytometry.**

First, use FSC/SSC to verify cell size and granularity and to exclude debris and erythrocytes. Check the location of the main population with the FSC single-parameter histogram. Next, gate on CD4 expression to identify helper T cells. Finally, use CD8 staining to further delineate cytotoxic T cells
